# Supplementary material
Source: publisher figshare collection journal article supplement (https://acs.figshare.com/ndownloader/files/10904174)

# Supplementary Material

## **Adamantane-Derived Carbon Nanothreads: High Structural Stability and Mechanical Strength**

S. Marutheeswaran and Eluvathingal D. Jemmis\*

*Department of Inorganic and Physical Chemistry, Indian Institute of Science, Bangalore 560012*

e-mail: [jemmis@gmail.com](mailto:jemmis@gmail.com)

### **Contents**

**Figure S1:** Nanothreads from Dimond lattice.

**Figure S2:** Nanothreads from hexagonal Dimond lattice.

**Figure S3:** Nanothreads from C-centered orthorhombic  $C_8$  (Cco- $C_8$ ) lattice.

**Figure S4:** Nanothreads from Body centered tetragonal  $C_4$  (Bct- $C_4$ ) lattice.

**Figure S1:** Nanothreads from Dimond lattice.

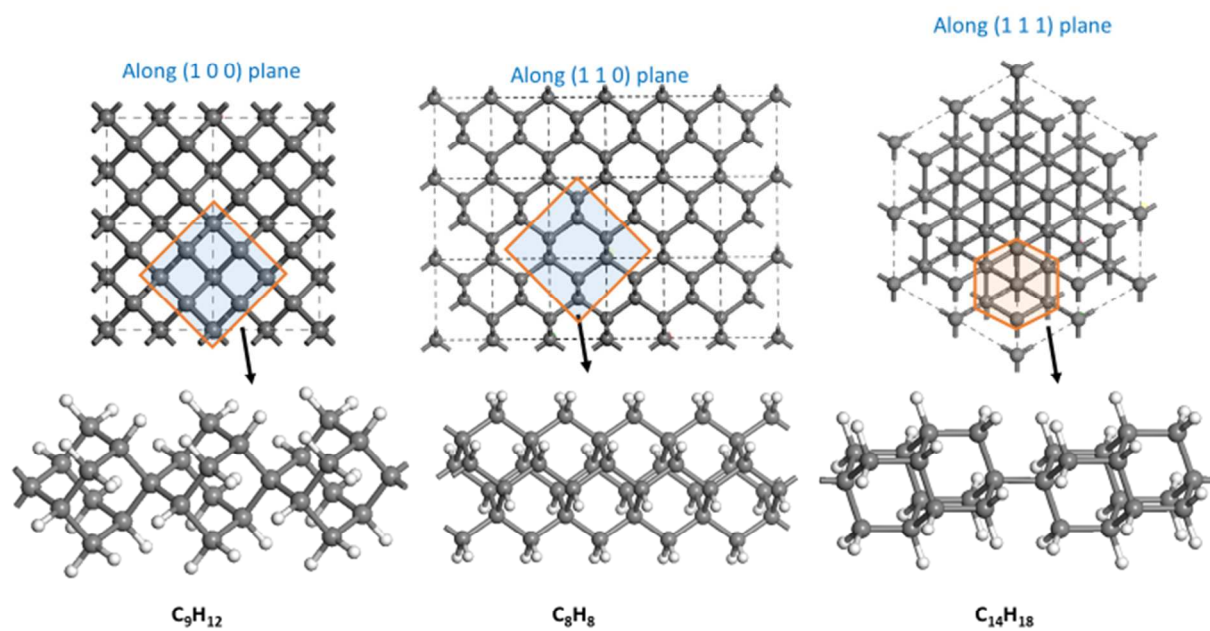

**Figure S2:** Nanothreads from hexagonal Dimond lattice.

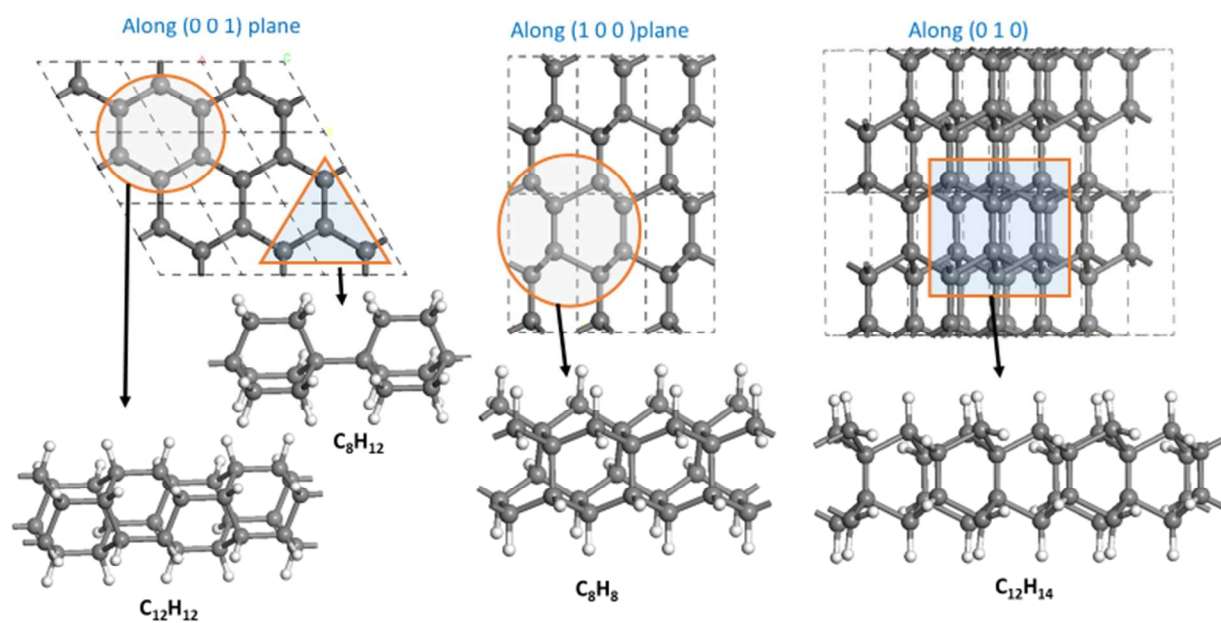

**Figure S3:** Nanothreads from C-centered orthorhombic  $C_8$  (Cco- $C_8$ ) lattice. Different colors were used for clarity.

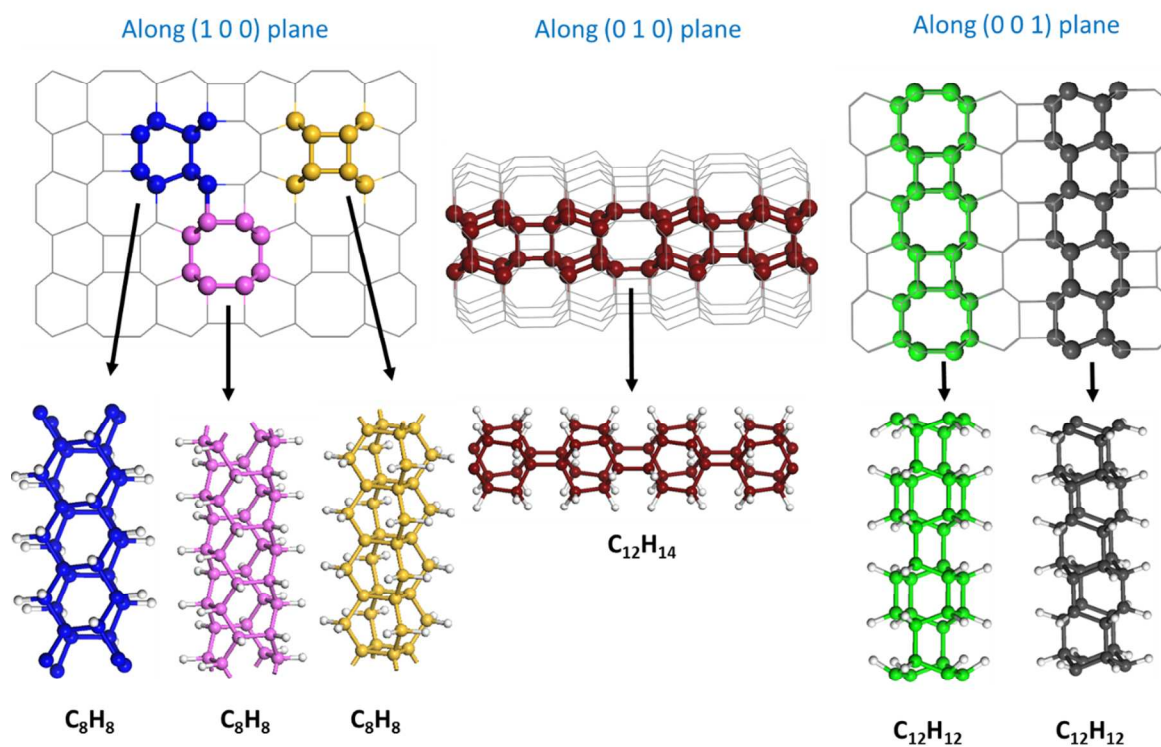

**Figure S4:** Nanothreads from Body centered tetragonal  $C_4$  (Bct- $C_4$ ) lattice. Different colors were used for clarity.

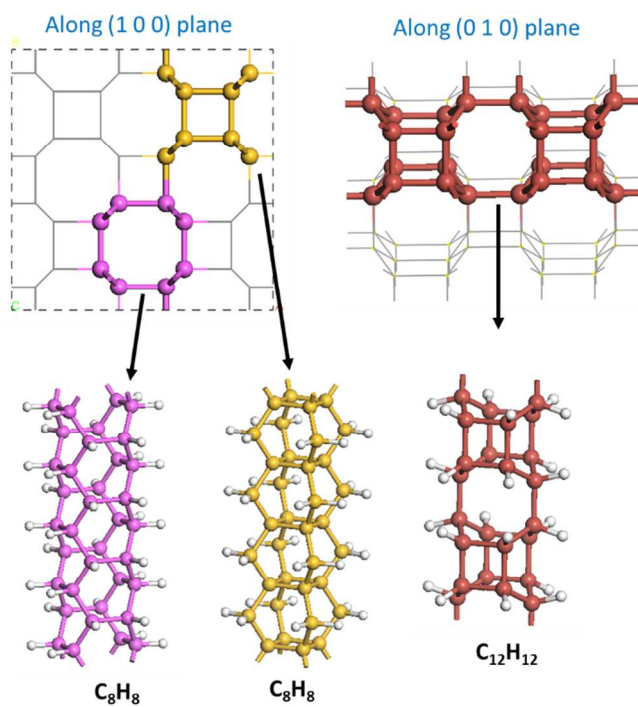

Supplement: Supplementary file 1 [file 10904174]
